# Supplementary material for: Ce0.80M0.12Sn0.08O2−δ (M = Hf, Zr, Pr, and La) ternary oxide solid solutions with superior properties for CO oxidation
Source: Royal Society of Chemistry journal article supplement (doi:10.1039/c5ra00557d), 2015-01-01

## Electronic Supplementary Information

### **Ce<sub>0.80</sub>M<sub>0.12</sub>Sn<sub>0.08</sub>O<sub>2-δ</sub> (M = Hf, Zr, Pr, and La) ternary oxide solid solutions with superior properties for CO oxidation**

**Damma Devaiah,<sup>a,b</sup> Takuya Tsuzuki,<sup>b</sup> Thirupathi Boningari,<sup>c</sup> Panagiotis G. Smirniotis,<sup>c</sup> Benjaram M. Reddy,<sup>a,\*</sup>**

<sup>a</sup>Inorganic and Physical Chemistry Division, CSIR-Indian Institute of Chemical Technology, Uppal Road, Hyderabad – 500 007, India

E-mail: [bmreddy@iiict.res.in](mailto:bmreddy@iiict.res.in); Fax: +91 40 2716 0921; Tel: +91 40 27193510

<sup>b</sup>Research School of Engineering, Australian National University, Canberra, ACT 0200, Australia

<sup>c</sup>Chemical Engineering Program, School of Energy, Environmental, Biological and Medicinal Engineering, University of Cincinnati, Cincinnati, OH 45221-0012, USA

**Table S1.** Desired quantities of metal precursors for the preparation of co-doped CeO<sub>2</sub> samples (8 g batch).

| Precursors                                            | CHS      | CZS      | CPS      | CLS      |
|-------------------------------------------------------|----------|----------|----------|----------|
| Ce(NO <sub>3</sub> ) <sub>3</sub> ·6H <sub>2</sub> O  | 15.878 g | 16.887 g | 14.677 g | 14.715 g |
| SnCl <sub>4</sub> ·5H <sub>2</sub> O                  | 1.281 g  | 1.363 g  | 1.184 g  | 1.186 g  |
| HfCl <sub>4</sub>                                     | 1.756 g  | –        | –        | –        |
| ZrO(NO <sub>3</sub> ) <sub>2</sub> ·xH <sub>2</sub> O | –        | 1.347 g  | –        | –        |
| Pr(NO <sub>3</sub> ) <sub>3</sub> ·6H <sub>2</sub> O  | –        | –        | 2.205 g  | –        |
| La(NO <sub>3</sub> ) <sub>3</sub> ·6H <sub>2</sub> O  | –        | –        | –        | 4.401 g  |

**Table S2.** TEM-EDX analysis of co-doped CeO<sub>2</sub> samples.

| Sample                                                                    | Element | Atomic (%) |
|---------------------------------------------------------------------------|---------|------------|
| Ce <sub>0.80</sub> Hf <sub>0.12</sub> Sn <sub>0.08</sub> O <sub>2-δ</sub> | Ce      | 80.5       |
|                                                                           | Hf      | 11.5       |
|                                                                           | Sn      | 7.9        |
| Ce <sub>0.80</sub> Zr <sub>0.12</sub> Sn <sub>0.08</sub> O <sub>2-δ</sub> | Ce      | 80.8       |
|                                                                           | Zr      | 11.7       |
|                                                                           | Sn      | 7.4        |
| Ce <sub>0.80</sub> Pr <sub>0.12</sub> Sn <sub>0.08</sub> O <sub>2-δ</sub> | Ce      | 79.7       |
|                                                                           | Pr      | 11.9       |
|                                                                           | Sn      | 8.3        |
| Ce <sub>0.80</sub> La <sub>0.12</sub> Sn <sub>0.08</sub> O <sub>2-δ</sub> | Ce      | 79.9       |
|                                                                           | La      | 12.2       |
|                                                                           | Sn      | 7.8        |

**Figure S1.** X-ray diffraction patterns of spent co-doped CeO<sub>2</sub> samples.

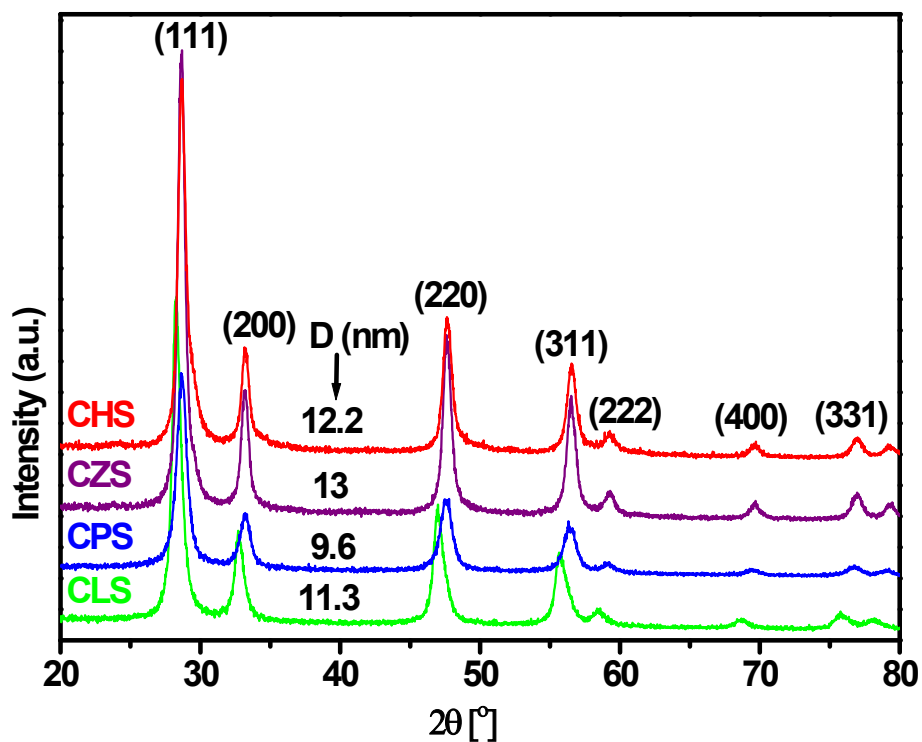

The XRD patterns of all spent catalysts along with their crystallite sizes are presented in Figure S1. From this, it is evident that the crystallite size of spent CZS, CHS, and CLS samples considerably increased compared to their corresponding fresh catalysts. However, the crystallite size of spent CPS is similar to that of fresh CPS sample. This result obviously indicates the better stability of CPS sample than other investigated ternary oxide samples.

**Figure S2.** XP spectra of Hf 4f for CHS sample, Zr 3d for CZS sample, Pr 3d for CPS sample, and La 3d for CLS sample.

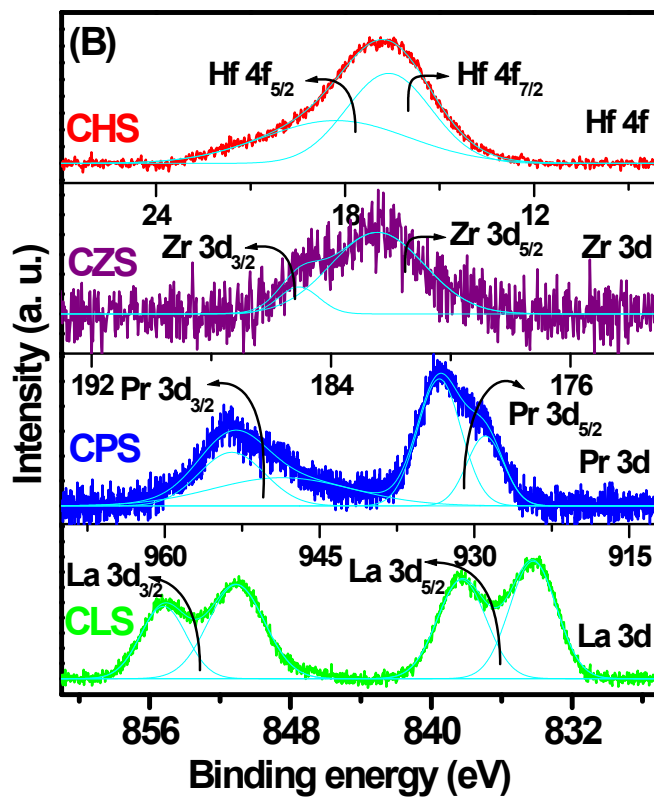

**Figure S3.** Catalytic activity of  $\text{Ce}_{0.80}\text{Zr}_{0.16}\text{Sn}_{0.04}\text{O}_{2-\delta}$  (CZS4),  $\text{Ce}_{0.80}\text{Zr}_{0.12}\text{Sn}_{0.08}\text{O}_{2-\delta}$  (CZS8),  $\text{Ce}_{0.80}\text{Zr}_{0.08}\text{Sn}_{0.12}\text{O}_{2-\delta}$  (CZS12), and  $\text{Ce}_{0.80}\text{Zr}_{0.04}\text{Sn}_{0.16}\text{O}_{2-\delta}$  (CZS16) samples for CO oxidation.

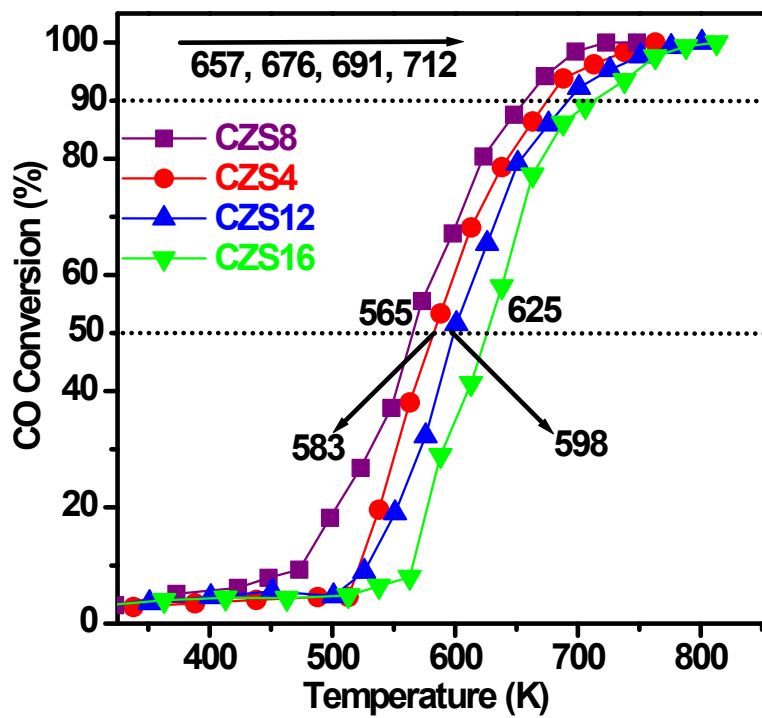

Supplement: c5ra00557d1.pdf [file c5ra00557d1.pdf]
